# Supplementary material for: Evaluation of Telehealth in Child Behavioral Health Services Delivery During the COVID-19 Pandemic
Source: Atypon-hosted journal article supplement (doi:10.1176/appi.ps.20220141), 2022-09-13
Supplement: appi.ps.20220141.ds001.pdf [file appi.ps.20220141.ds001.pdf]

**Supplemental Table 1:** Characteristics of study population before and during the COVID-19 pandemic.

|                               | April-December,<br>2019<br>N = 4,458 | April-December,<br>2020<br>N = 2,794 | <i>P</i> -value  |
|-------------------------------|--------------------------------------|--------------------------------------|------------------|
| Caregiver transportation need |                                      |                                      |                  |
| No issues                     | 4 196 (94.1%)                        | 2 671 (95.6%)                        | <i>P</i> = 0.024 |
| Resolved                      | 86 (1.9%)                            | 39 (1.4%)                            |                  |
| Unresolved                    | 176 (3.9%)                           | 84 (3.0%)                            |                  |
| LOS (days)                    | 112 (44.5)                           | 112 (50.1)                           | <i>P</i> = 0.976 |
| Number of assessments         | 2.29 (0.53)                          | 2.36 (0.59)                          | <i>P</i> < 0.001 |
| Age (years)                   | 11.9 (3.62)                          | 12.0 (3.69)                          | <i>P</i> = 0.126 |
| Gender                        |                                      |                                      |                  |
| Female                        | 2 127 (47.7%)                        | 1 393 (49.9%)                        | <i>P</i> = 0.079 |
| Male                          | 2 331 (52.3%)                        | 1 401 (50.1%)                        |                  |
| Race/Ethnicity                |                                      |                                      |                  |
| White                         | 2 806 (62.9%)                        | 1 670 (59.8%)                        | <i>P</i> < 0.001 |
| Black/African American        | 142 (3.2%)                           | 93 (3.3%)                            |                  |
| Asian                         | 508 (11.4%)                          | 426 (15.2%)                          |                  |
| Hispanic/Latino               | 767 (17.2%)                          | 428 (15.3%)                          |                  |
| Other                         | 235 (5.3%)                           | 178 (6.3%)                           |                  |
| Strengths TAI                 | 4.36 (3.19)                          | 4.02 (3.16)                          | <i>P</i> < 0.001 |
| Life-functioning TAI          | 2.25 (2.09)                          | 2.01 (2.03)                          | <i>P</i> < 0.001 |
| Behavior-emotional TAI        | 4.21 (3.22)                          | 4.05 (3.20)                          | <i>P</i> = 0.041 |
| Risky-behaviors TAI           | 1.01 (1.59)                          | 0.87 (1.55)                          | <i>P</i> < 0.001 |
